# Supplementary material for: Treatment of Relapsed/Refractory Hodgkin Lymphoma: Real-World Data from the Czech Republic and Slovakia
Source: PubMed Central journal article supplement (PMC6775599; doi:10.7150/jca.29308), 2019-08-28
Supplement: jcav10p5041s1.pdf [file jcav10p5041s1.pdf]

## Supplementary Appendix

**Table S1: Therapeutic responders with brentuximab vedotin: univariate and multivariate logistic regression models**

| Predictors                   |                          | Univariate models    |              | Multivariate adjusted model <sup>a</sup> |              |
|------------------------------|--------------------------|----------------------|--------------|------------------------------------------|--------------|
|                              |                          | OR (95% CI)          | P            | OR (95% CI)                              | P            |
| Sex                          | Men                      | Ref.                 |              | Ref.                                     |              |
|                              | Women                    | 1.778 (0.587–5.382)  | 0.309        | 1.937 (0.418–8.976)                      | 0.398        |
| Age at time of diagnosis     | <25                      | Ref.                 |              | Ref.                                     |              |
|                              | ≥25                      | 0.960 (0.307–2.998)  | 0.944        | 0.951 (0.201–4.494)                      | 0.949        |
| HL stage                     | I+II                     | Ref.                 |              | Ref.                                     |              |
|                              | III                      | 0.907 (0.259–3.177)  | 0.879        | 0.504 (0.079–3.208)                      | 0.468        |
|                              | IV                       | 0.359 (0.079–1.623)  | 0.183        | 0.178 (0.019–1.632)                      | 0.127        |
| Indication for BV            | Relapse after ASCT       | Ref.                 |              | Ref.                                     |              |
|                              | R/R, unsuitable for ASCT | 0.486 (0.051–4.676)  | 0.532        | -                                        | -            |
| Number of previous regimens  | 2                        | Ref.                 |              | Ref.                                     |              |
|                              | >2                       | 0.151 (0.045–0.507)  | <b>0.002</b> | 0.212 (0.049–0.911)                      | <b>0.037</b> |
| Previous ASCT                | No                       | Ref.                 |              | Ref.                                     |              |
|                              | Yes – 1 transplant       | 1.750 (0.179–17.101) | 0.630        | 3.894<br>(0.060–253.325)                 | 0.523        |
|                              | Yes – 2 transplants      | 5.333 (0.375–75.776) | 0.216        | 10.766<br>(0.138–839.536)                | 0.285        |
| Previous allo-SCT            | No                       | Ref.                 |              | Ref.                                     |              |
|                              | Yes                      | 3.200 (0.637–16.066) | 0.158        | 7.227 (0.710–73.592)                     | 0.095        |
| Number of BV cycles          | 2–5                      | Ref.                 |              | Ref.                                     |              |
|                              | 6–10                     | 3.463 (0.822–14.593) | 0.091        | 4.599 (0.718–29.462)                     | 0.107        |
|                              | 11–16                    | 7.083 (1.172–42.793) | <b>0.033</b> | 15.172<br>(1.157–198.967)                | <b>0.038</b> |
| Dose reduction               | No                       | Ref.                 |              | Ref.                                     |              |
|                              | Yes                      | -                    | -            | -                                        | -            |
| Interval change <sup>b</sup> | No                       | Ref.                 |              | Ref.                                     |              |
|                              | Yes                      | 0.556 (0.084–3.690)  | 0.543        | -                                        | -            |

<sup>a</sup>Calculation of multivariate adjusted model is based on predictors which are not redundant and do not contain missing values. <sup>b</sup>Data are not available for 34 patients.

allo-SCT: allogenic stem cell transplantation; ASCT: autologous stem cell transplantation; BV: brentuximab vedotin; CI: confidence interval; HL: Hodgkin lymphoma; OR: odds ratio; PD: progressive disease; PR: partial response; Ref.: reference value; R/R: relapsed/refractory; SD: stable disease.

**Table S2: Relapse occurrence after brentuximab vedotin in univariate and multivariate logistic regression models**

| Predictors                   |                          | Univariate models    |       | Multivariate adjusted model <sup>a</sup> |       |
|------------------------------|--------------------------|----------------------|-------|------------------------------------------|-------|
|                              |                          | OR (95% CI)          | P     | OR (95% CI)                              | P     |
| Sex                          | Men                      | Ref.                 |       | Ref.                                     |       |
|                              | Women                    | 2.667 (0.397–17.914) | 0.313 | 3.510 (0.328–37.594)                     | 0.299 |
| Age at time of diagnosis     | <25                      | Ref.                 |       | Ref.                                     |       |
|                              | ≥25                      | 0.308 (0.045–2.083)  | 0.227 | 0.118 (0.008–1.654)                      | 0.113 |
| HL stage                     | I+II                     | Ref.                 |       | Ref.                                     |       |
|                              | III+IV                   | 1.500 (0.223–10.077) | 0.677 | 3.503 (0.193–63.630)                     | 0.397 |
| Indication for BV            | Relapse after ASCT       | Ref.                 |       | Ref.                                     |       |
|                              | R/R, unsuitable for ASCT | -                    | -     | -                                        | -     |
| Number of previous regimens  | 2                        | Ref.                 |       | Ref.                                     |       |
|                              | >2                       | 1.333 (0.216–8.219)  | 0.757 | 1.964 (0.200–19.259)                     | 0.562 |
| Previous ASCT                | No                       | Ref.                 |       | Ref.                                     |       |
|                              | Yes – 1 transplant       | -                    | -     | -                                        | -     |
|                              | Yes – 2 transplants      | -                    | -     | -                                        | -     |
| Previous allo-SCT            | No                       | Ref.                 |       | Ref.                                     |       |
|                              | Yes                      | -                    | -     | -                                        | -     |
| Number of BV cycles          | 2–5                      | Ref.                 |       | Ref.                                     |       |
|                              | 6–10                     | 0.417 (0.045–3.838)  | 0.440 | 0.317 (0.016–6.265)                      | 0.450 |
|                              | 11–16                    | 1.250 (0.118–13.240) | 0.853 | 0.741 (0.032–17.172)                     | 0.852 |
| Dose reduction               | No                       | Ref.                 |       | Ref.                                     |       |
|                              | Yes                      | -                    | -     | -                                        | -     |
| Interval change <sup>b</sup> | No                       | Ref.                 |       | Ref.                                     |       |
|                              | Yes                      | -                    | -     | -                                        | -     |

<sup>a</sup>Calculation of multivariate adjusted model is based on predictors which are not redundant and do not contain missing values. <sup>b</sup>Data are not available for 34 patients.

allo-SCT: allogenic stem cell transplantation; ASCT: autologous stem cell transplantation; BV: brentuximab vedotin; CI: confidence interval; HL: Hodgkin lymphoma; OR: odds ratio; PD: progressive disease; PR: partial response; Ref.: reference value; R/R: relapsed/refractory; SD: stable disease.

**Table S3: Overall survival from diagnosis and initiation of brentuximab vedotin treatment: univariate Cox regression models (N = 58)**

| Predictors                   |                          | Time from diagnosis  |              | Time from initiation of BV |              |
|------------------------------|--------------------------|----------------------|--------------|----------------------------|--------------|
|                              |                          | HR (95% CI)          | P            | HR (95% CI)                | P            |
| Sex                          | Men                      | Ref.                 |              |                            |              |
|                              | Women                    | 0.531 (0.191–1.479)  | 0.226        | 0.457 (0.175–1.194)        | 0.110        |
| Age at time of diagnosis     | <25                      | Ref.                 |              | Ref.                       |              |
|                              | ≥25                      | 1.615 (0.618–4.216)  | 0.328        | 1.407 (0.537–3.691)        | 0.487        |
| HL stage                     | I+II                     | Ref.                 |              | Ref.                       |              |
|                              | III                      | 2.379 (0.692–8.180)  | 0.169        | 1.561 (0.442–5.506)        | 0.489        |
|                              | IV                       | 3.788 (1.160–12.366) | <b>0.027</b> | 3.274 (1.013–10.807)       | <b>0.048</b> |
| Indication for BV            | Relapse after ASCT       | Ref.                 |              | Ref.                       |              |
|                              | R/R, unsuitable for ASCT | 1.712 (0.390–7.519)  | 0.477        | 1.726 (0.396–7.523)        | 0.468        |
| Number of previous regimens  | 2                        | Ref.                 |              | Ref.                       |              |
|                              | >2                       | 2.273 (0.658–7.853)  | 0.194        | 3.121 (0.913–10.669)       | 0.070        |
| Previous ASCT                | No                       | Ref.                 |              | Ref.                       |              |
|                              | Yes – 1 transplant       | 0.683 (0.154–3.028)  | 0.616        | 0.644 (0.147–2.820)        | 0.560        |
|                              | Yes – 2 transplants      | 0.162 (0.014–1.858)  | 0.144        | 0.208 (0.019–2.318)        | 0.202        |
| Previous allo-SCT            | No                       | Ref.                 |              | Ref.                       |              |
|                              | Yes                      | 1.369 (0.398–4.704)  | 0.618        | 1.017 (0.289–3.577)        | 0.979        |
| Number of BV cycles          | 2–5                      | Ref.                 |              | Ref.                       |              |
|                              | 6–10                     | 0.446 (0.172–1.161)  | 0.098        | 0.330 (0.121–0.899)        | <b>0.030</b> |
|                              | 11–16                    | 0.230 (0.049–1.079)  | 0.062        | 0.200 (0.041–0.970)        | <b>0.046</b> |
| Dose reduction               | No                       | Ref.                 |              | Ref.                       |              |
|                              | Yes                      | -                    | -            | -                          | -            |
| Interval change <sup>a</sup> | No                       | Ref.                 |              | Ref.                       |              |
|                              | Yes                      | 0.861 (0.187–3.959)  | 0.847        | 1.338 (0.297–6.021)        | 0.704        |

<sup>a</sup>Data are not available for 34 patients.

allo-SCT: allogenic stem cell transplantation; ASCT: autologous stem cell transplantation; BV: brentuximab vedotin; CI: confidence interval; HL: Hodgkin lymphoma; HR: hazard ratio; PD: progressive disease; PR: partial response; Ref.: reference value; R/R: relapsed/refractory; SD: stable disease.
